# Supplementary material for: Resilience in the Depths: First Example of Fin Regeneration in a Silky Shark (Carcharhinus falciformis) following Traumatic Injury
Source: Hindawi journal article supplement (doi:10.1155/2023/6639805), 2023-12-14
Supplement: f1 [file 6639805.f1.docx]

**Supplemental Material**

**S1**. Measurements of wound and fin tissue.

| Left side | |
| --- | --- |
| **Area measured** | **Average area (mm)** |
| Wound | 202.6 |
| Injured fin | 800.3 |
| Estimated original fin total | 1002.9 |
| Healed fin | 968.2 |
| Right side | |
| **Area measured** | **Average area (mm)** |
| Wound | 325.5 |
| Injured fin | 1205 |
| Estimated original fin total | 1530.5 |
| Healed fin | 1251.8 |

**S2**. Results of unpaired t-test.

|  | Right side | Left side |
| --- | --- | --- |
| t | 4.56 | 15.99 |
| df | 18 | 18 |
| se | 10.26 | 10.49 |
| Two-tailed p | 0.0002 | <0.0001 |
